# Supplementary material for: Anti-Inflammatory and Antipruritic Effects of Remote Ischaemic Postconditioning in a Mouse Model of Experimental Allergic Contact Dermatitis
Source: MDPI journal article supplement (doi:10.3390/medicina59101816), 2023-10-12
Supplement: s1 [file s1]

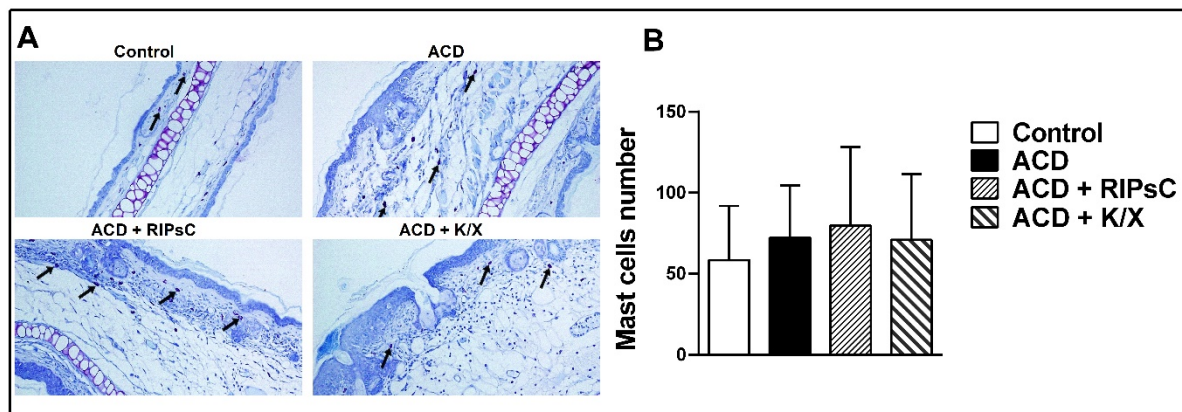

**Figure S1.** Micrographs showing mast cell distribution in the ear tissue with toluidine blue staining, 400× (**A**) and mast cell numbers (**B**). ACD: allergic contact dermatitis; RIPsC: remote ischemic postconditioning; K/X: ketamine/xylazine. Arrow: mast cell. One-way analysis of variance, post hoc Bonferroni test. Data are expressed as mean ± SD (n = 8).
